# Supplementary figures and images for: Continuous reactions in supercritical fluids; a cleaner, more selective synthesis of thymol in supercritical CO2
Source: Royal Society of Chemistry journal article supplement (doi:10.1039/b418983c), 2005-01-01

Synchronous Chromatogram

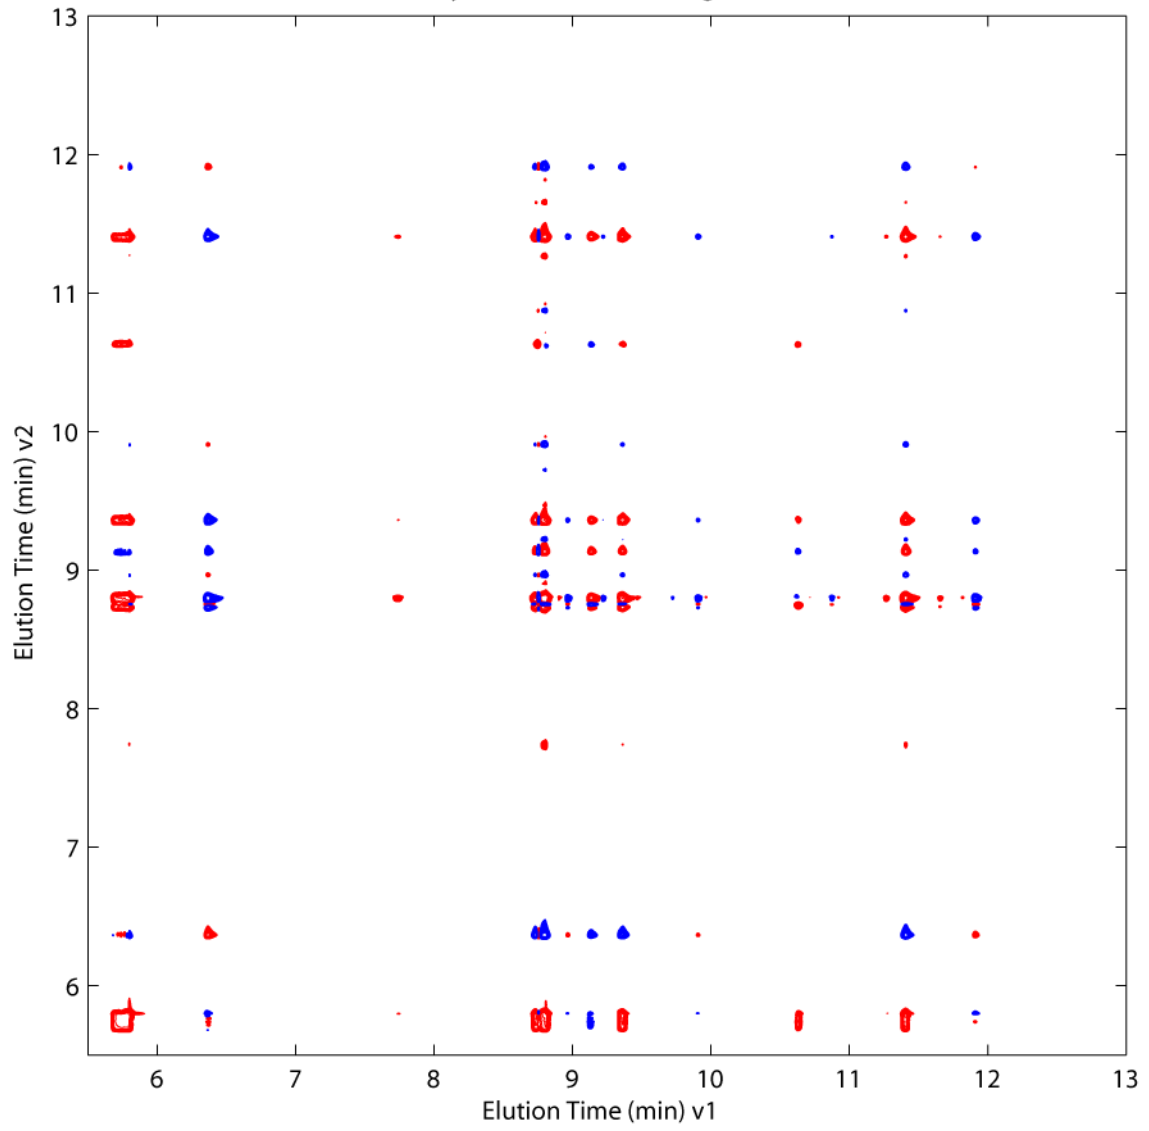

Asynchronous Chromatogram

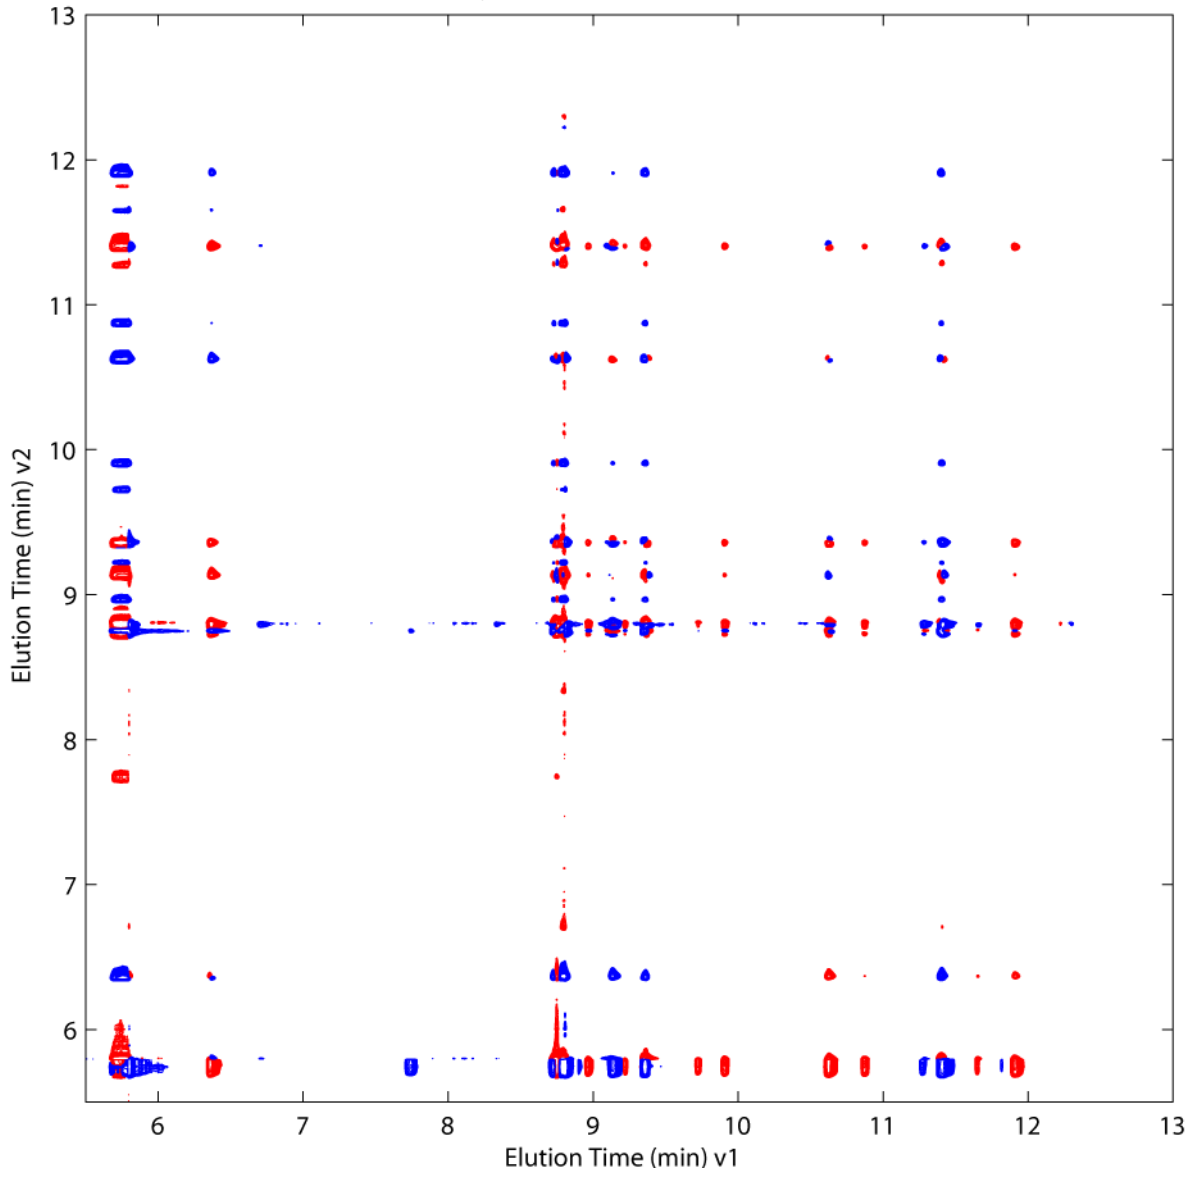

Supplement: b418983c-1.pdf [file b418983c-1.pdf]

Synchronous Chromatogram

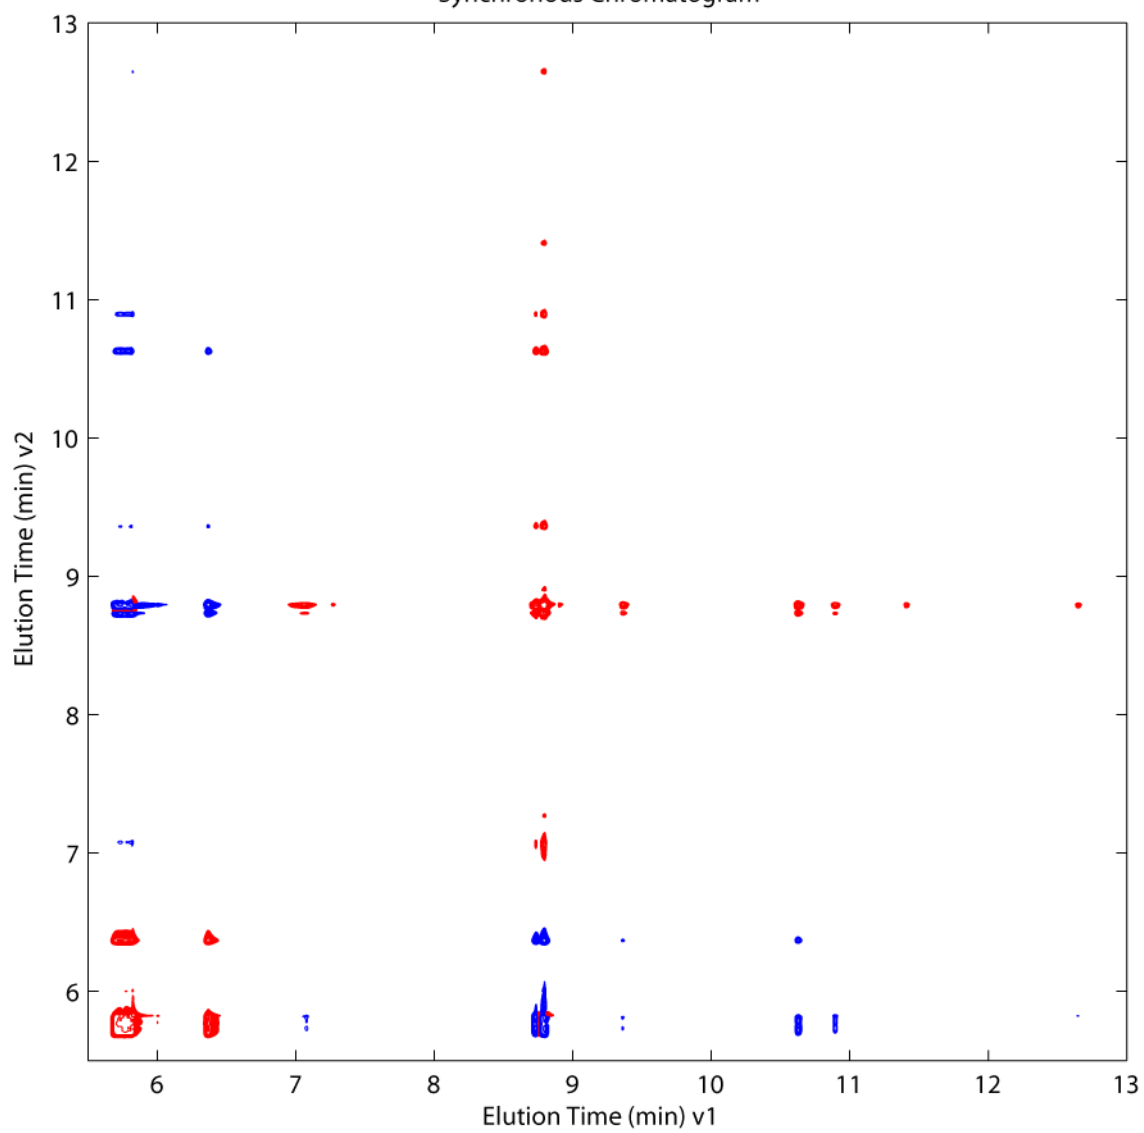

Asynchronous Chromatogram

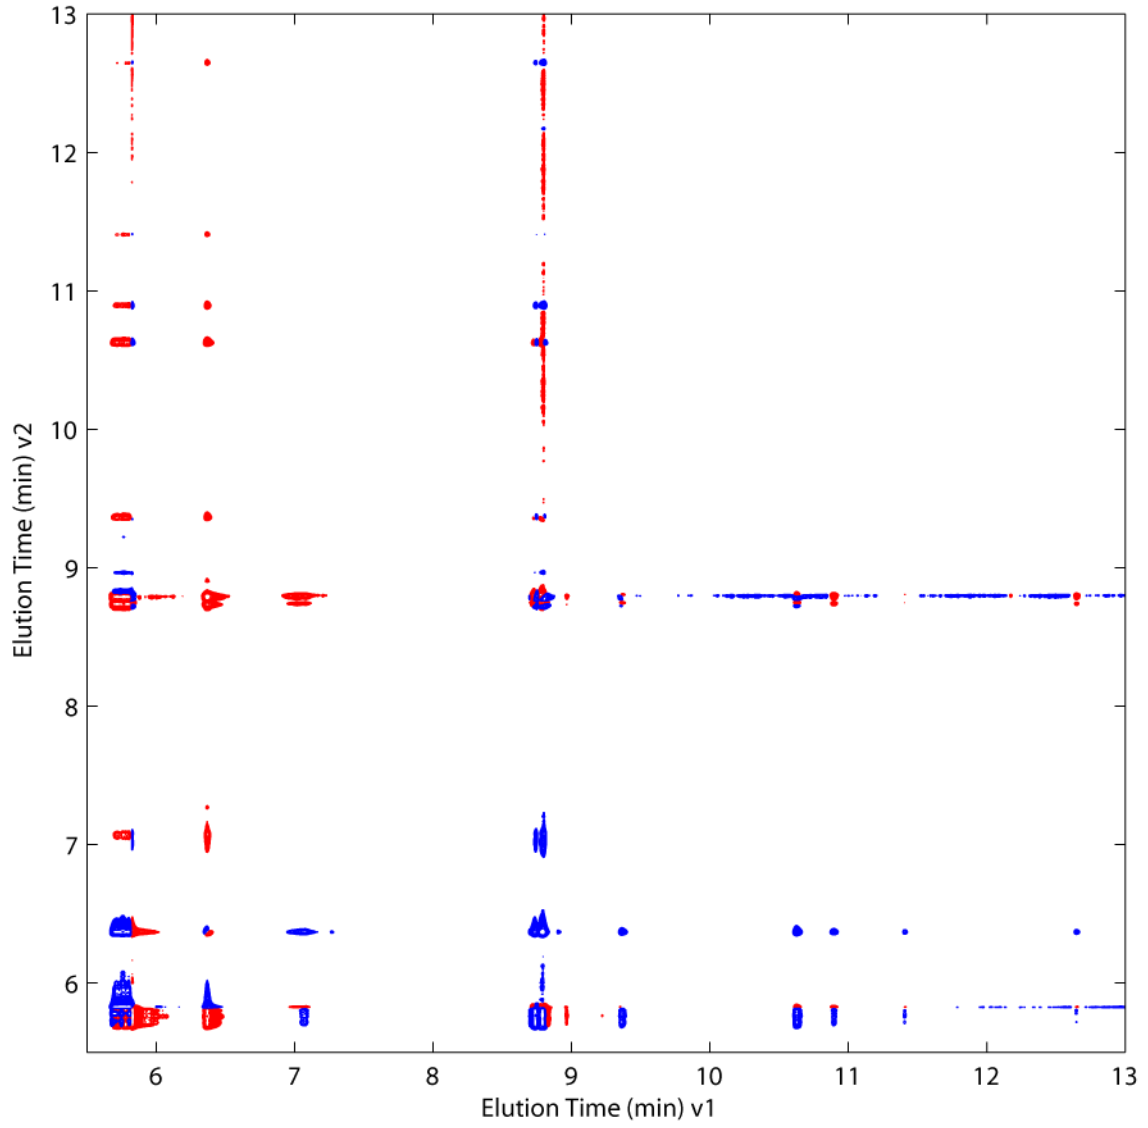

Supplement: b418983c-2.pdf [file b418983c-2.pdf]
